# Supplementary material for: EASY-FIA: A Readably Usable Standalone Tool for High-Resolution Mass Spectrometry Metabolomics Data Pre-Processing
Source: MDPI journal article supplement (doi:10.3390/metabo13010013), 2022-12-21
Supplement: s1 [file s1]

# **EASY-FIA: A Readably Usable Standalone Tool for High-Resolution Mass Spectrometry Metabolomics Data Pre-Processing**

Aurelia Morabito <sup>1,2</sup>, Giulia De Simone <sup>1,3</sup>, Manuela Ferrario <sup>2</sup>, Francesca Falcetta <sup>4</sup>, Roberta Pastorelli <sup>1</sup> and Laura Brunelli <sup>1,\*</sup>

1 Laboratory of Mass Spectrometry, Istituto di Ricerche Farmacologiche Mario Negri IRCCS, Milan, Italy

2 Department of Electronics, Information and Bioengineering, Politecnico di Milano, Milan, Italy.

3 Department of Biotechnologies and Biosciences, Università degli Studi Milano Bicocca, 20126 Milan, Italy

4 Unit of Biophysics, Istituto di Ricerche Farmacologiche Mario Negri IRCCS, Milan, Italy

## **Supplementary materials**

**Supplementary figure 1:** Graphic User Interface of EASY-FIA

**Supplementary figure 2:** Case study 1-Multiple plots of 100 random  $m/z$  intensities (y axis) through the runs (x axis) for positive (A) and negative (B) ionization modes.

**Supplementary figure 3:** Case study 2-Multiple plots of 100 random  $m/z$  intensities (y axis) through the runs (x axis) for positive (A) and negative (B) ionization modes.

**Supplementary Table 1:** Matrix of intensities of case study 1 in positive ionization.

<https://github.com/AMrbt20/SupplementaryMaterials>

**Supplementary Table 2:** Matrix of intensities of case study 1 in negative ionization.

<https://github.com/AMrbt20/SupplementaryMaterials>

**Supplementary Table 3:** Matrix of intensities of case study 2 in positive ionization.

<https://github.com/AMrbt20/SupplementaryMaterials>

**Supplementary Table 4:** Matrix of intensities of case study 2 in negative ionization.

<https://github.com/AMrbt20/SupplementaryMaterials>

**Supplementary table 5:** Summary of the number of  $m/z$  identified, not identified, and correctly aligned by EASY-FIA after discarding the  $m/z$  detected in a single sample.

**Supplementary table 6:** Number of  $m/z$  acquired in the samples and blanks, in accordance with the acquisition mode. Table also reports the percentage of shared  $m/z$  between samples and blanks in both case studies.

**Supplementary Figure S1:** Graphic User Interface of EASY-FIA.

**EASY-FIA**

| Parameters        |   |
|-------------------|---|
| Delta mass (ppm)  | 6 |
| Intensity cut-off | 0 |
| Sample cut-off    | 1 |

| Adduct definition |         |
|-------------------|---------|
| M-Na+             | 22.9892 |
| M-K+              | 38.9632 |

Output Folder  
Alignment-22-Feb-2022

☐ Sort matrix by adducts

**ALIGNMENT**

**HMDB ANNOTATION**

- Waiting -

**Supplementary Figure S2:** Case study 1-Multiple plots of 100 random  $m/z$  intensities (y axis) through the runs (x axis) for positive (A) and negative (B) ionization modes.

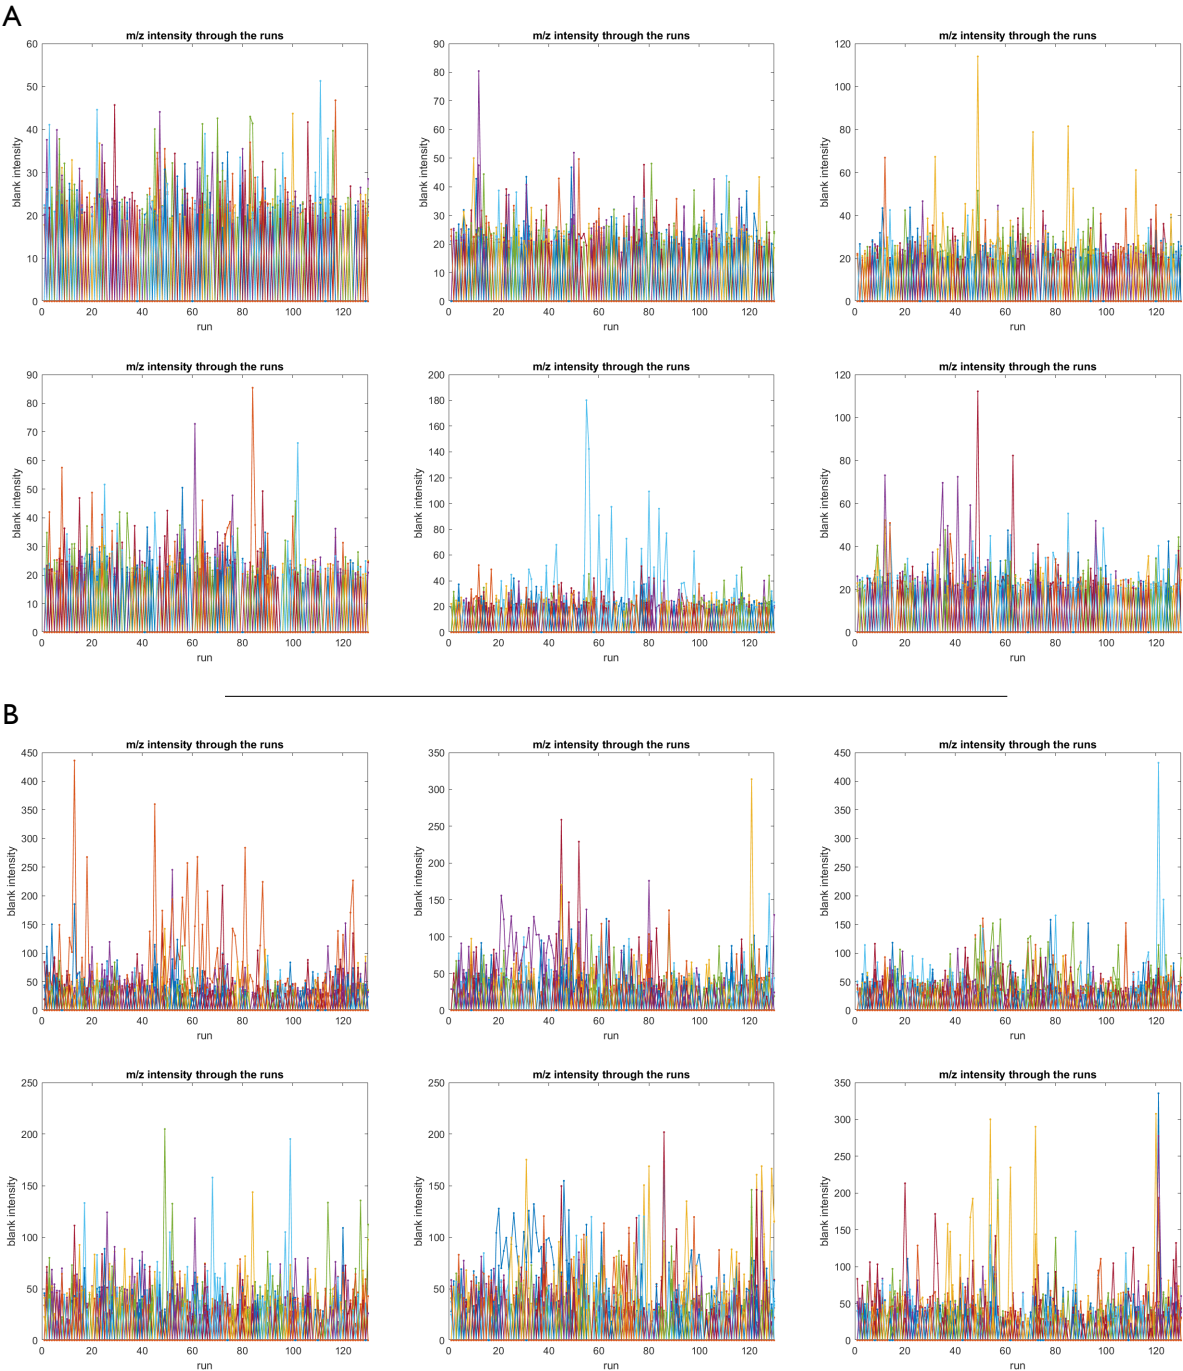

**Supplementary Figure S3:** Case study 2-Multiple plots of 100 random  $m/z$  intensities (y axis) through the runs (x axis) for positive (A) and negative (B) ionization modes.

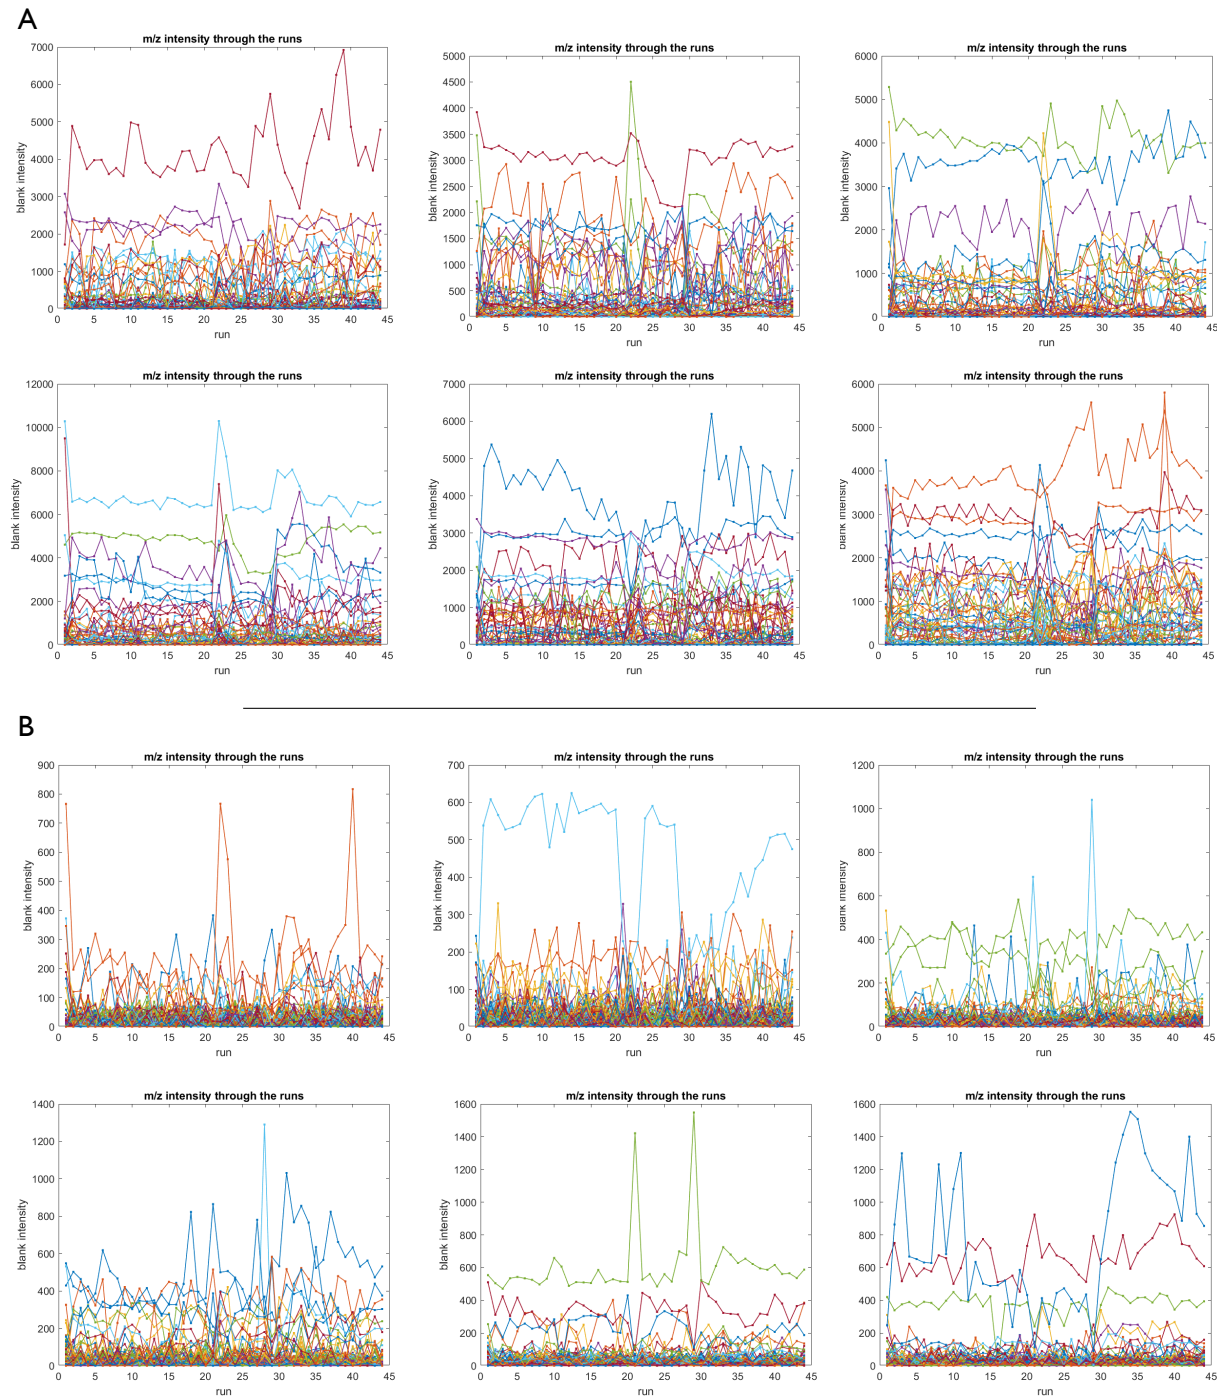

**Supplementary Table S5:** Summary of the number of  $m/z$  identified and not identified, correctly aligned by EASY-FIA after discarding the  $m/z$  detected in a single sample.

| Case Study | Acquisition mode | Identified $m/z$ | Not identified $m/z$ | Tot. $m/z$ | Tot. identified $m/z$ |
|------------|------------------|------------------|----------------------|------------|-----------------------|
| 1          | Positive         | 25.134           | 222.866              | 248.000    | 35.017                |
| 1          | Negative         | 9.883            | 241.674              | 251.557    |                       |
| 2          | Positive         | 12.024           | 26.339               | 38.363     | 20.084                |
| 2          | Negative         | 8.060            | 66.509               | 74.569     |                       |

**Supplementary Table S6:** Number of  $m/z$  acquired in the samples and blanks, in accordance with the acquisition mode. Table also reports the percentage of shared  $m/z$  between samples and blanks in both case studies.

| <b>Case Study</b> | <b>Acquisition mode</b> | <b>Sample <math>m/z</math></b> | <b>Blank <math>m/z</math></b> | <b>Sample/Blank <math>m/z</math> match (%)</b> |
|-------------------|-------------------------|--------------------------------|-------------------------------|------------------------------------------------|
| 1                 | Positive                | 263.122                        | 262.933                       | 21,43                                          |
| 1                 | Negative                | 262.943                        | 262.726                       | 27,47                                          |
| 2                 | Positive                | 54.885                         | 35.687                        | 38,19                                          |
| 2                 | Negative                | 74.799                         | 74.866                        | 96,54                                          |
